# Supplementary material for: Genetic Predisposition to a Higher Whole Body Water Mass May Increase the Risk of Atrial Fibrillation: A Mendelian Randomization Study
Source: MDPI journal article supplement (doi:10.3390/jcdd10020076), 2023-02-10
Supplement: s1 [file s1]

## *Supplementary Material*

### **Genetic predisposition to whole body water mass may increase the risk of atrial fibrillation: A Mendelian Randomization study**

**Supplementary Figure S1.** Scatter plot of SNPs associated with whole body water mass and the risk of atrial fibrillation.

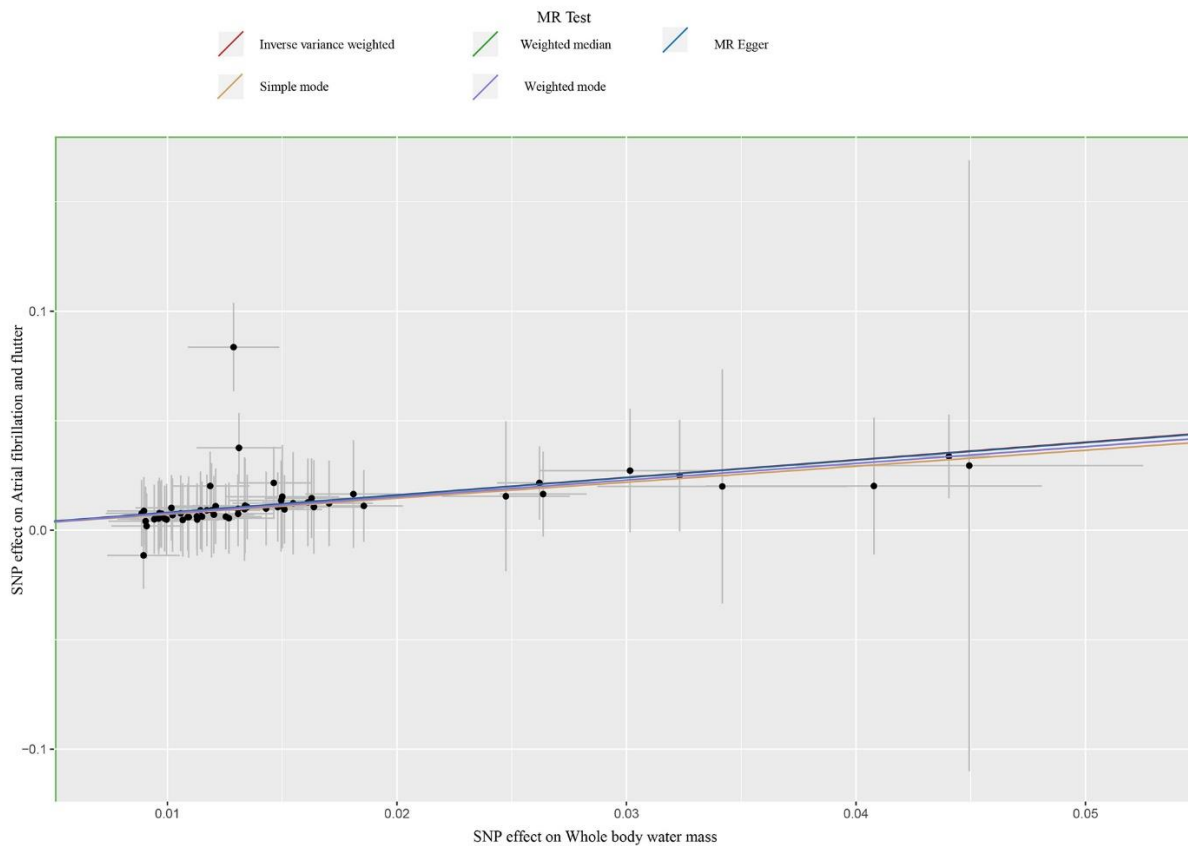

**Supplementary Figure S2.** Funnel plot of SNPs associated with body water mass and the risk of atrial fibrillation.

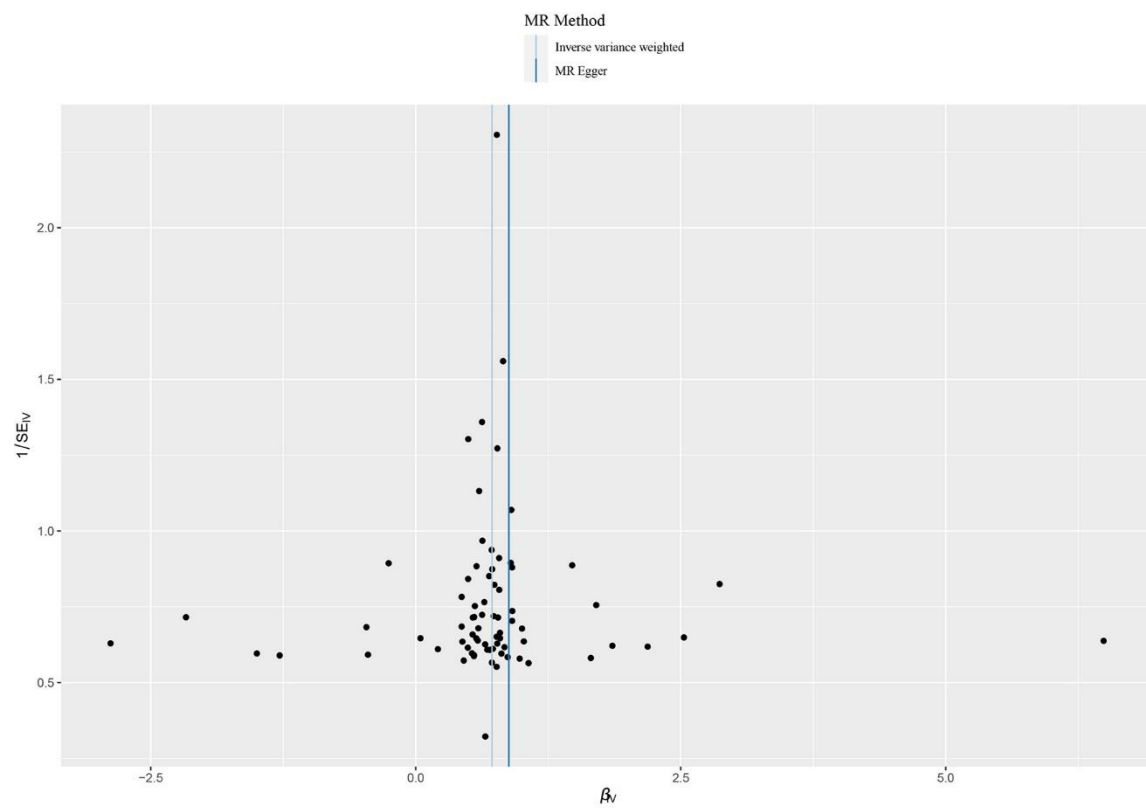

**Supplementary Figure S3.** Leave-One-Out of SNPs associated with whole body water mass and the risk of atrial fibrillation. OR, odds ratio; CI, confidence interval.

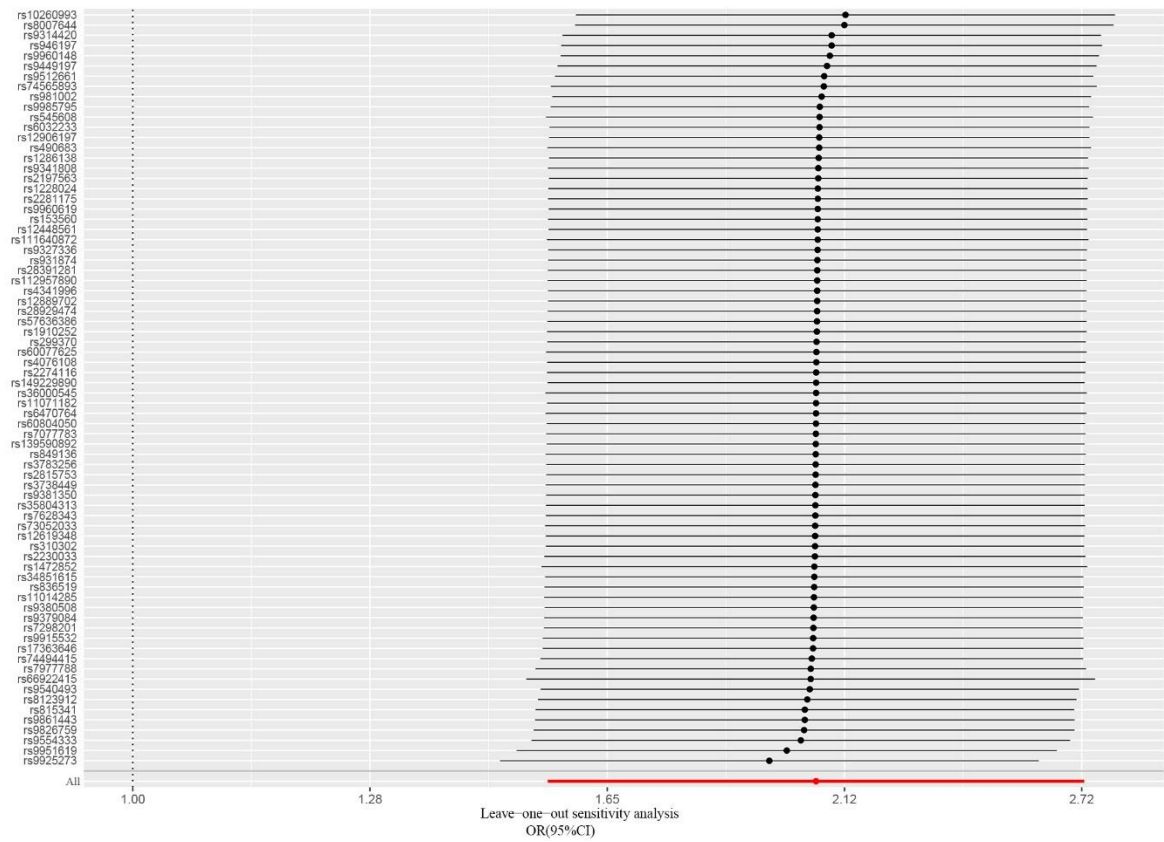

**Supplementary Figure S4.** Potential mediating mechanisms on the pathway from whole body water mass to atrial fibrillation. BWM: body water mass.

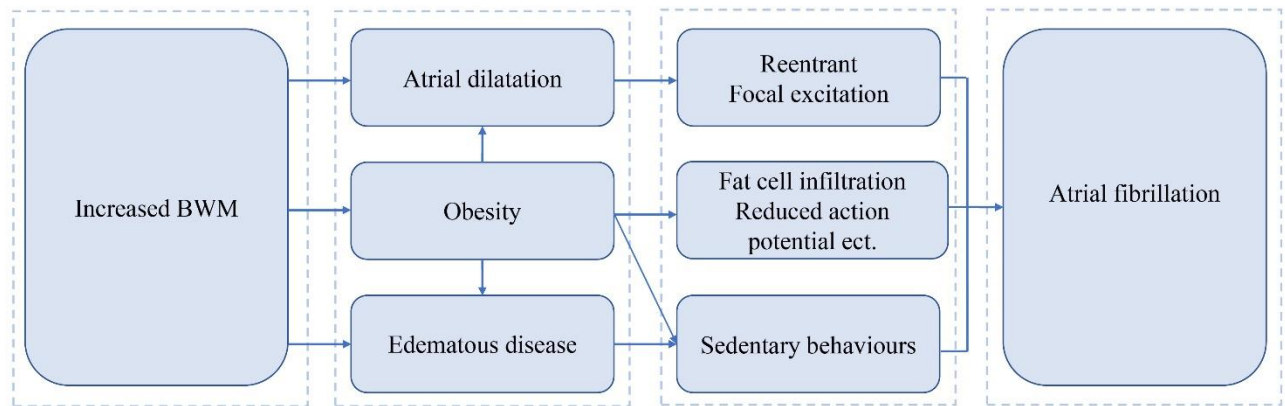

**Supplementary Tables**

**Supplementary Table S1.** Key figures and longitudinal metrics of atrial fibrillation from FinnGen.

| Variables                              | All    | Female | Male   |
|----------------------------------------|--------|--------|--------|
| Number of individuals                  | 22,068 | 8,847  | 13,221 |
| Unadjusted prevalence (%)              | 10.17  | 7.20   | 14.04  |
| Mean age at first event (years)        | 66.70  | 69.42  | 64.89  |
| Case fatality at 5-years (%)           | 9.69   | 9.07   | 10.11  |
| Median number of events per individual | 3.0    | 3.0    | 3.0    |
| Recurrence at 6 months (%)             | 56.98  | 56.08  | 57.58  |

**Supplementary Table S2.** 61 SNPs were employed as instrumental variables for investigating the association between whole body water mass with atrial fibrillation after outlier exclusion. EA, effect allele; OA, other allele; EAF, effect allele frequency; SE, standard error.

| No. | SNP         | EA | OA | EAF    | Beta    | SE     |
|-----|-------------|----|----|--------|---------|--------|
| 1   | rs11014285  | A  | G  | 0.1655 | 0.0181  | 0.0021 |
| 2   | rs11071182  | G  | A  | 0.8711 | 0.0134  | 0.0023 |
| 3   | rs111640872 | C  | G  | 0.3311 | 0.0151  | 0.0016 |
| 4   | rs112957890 | G  | A  | 0.2658 | 0.0120  | 0.0018 |
| 5   | rs1228024   | A  | C  | 0.6611 | -0.0115 | 0.0016 |
| 6   | rs12448561  | C  | G  | 0.4187 | 0.0100  | 0.0016 |
| 7   | rs12619348  | T  | C  | 0.1297 | -0.0134 | 0.0023 |
| 8   | rs1286138   | G  | T  | 0.6734 | 0.0113  | 0.0016 |
| 9   | rs12889702  | C  | A  | 0.3105 | 0.0096  | 0.0017 |
| 10  | rs12906197  | T  | C  | 0.4248 | -0.0125 | 0.0016 |
| 11  | rs139590892 | A  | G  | 0.1574 | -0.0119 | 0.0021 |
| 12  | rs1472852   | A  | C  | 0.1564 | -0.0323 | 0.0021 |
| 13  | rs149229890 | T  | G  | 0.0112 | 0.0449  | 0.0076 |
| 14  | rs153560    | A  | G  | 0.6056 | 0.0109  | 0.0016 |
| 15  | rs17363646  | G  | A  | 0.1346 | 0.0150  | 0.0023 |
| 16  | rs1910252   | T  | C  | 0.1641 | 0.0164  | 0.0021 |
| 17  | rs2197563   | A  | G  | 0.5958 | 0.0107  | 0.0016 |
| 18  | rs2230033   | A  | G  | 0.5653 | -0.0135 | 0.0016 |

|    |            |   |   |        |         |        |
|----|------------|---|---|--------|---------|--------|
| 19 | rs2274116  | T | C | 0.3439 | -0.0096 | 0.0016 |
| 20 | rs2281175  | C | T | 0.4057 | 0.0113  | 0.0016 |
| 21 | rs2815753  | A | G | 0.5989 | 0.0097  | 0.0016 |
| 22 | rs28391281 | C | T | 0.4598 | -0.0096 | 0.0015 |
| 23 | rs28929474 | T | C | 0.0204 | 0.0342  | 0.0054 |
| 24 | rs310302   | A | G | 0.4175 | -0.0089 | 0.0016 |
| 25 | rs34851615 | A | G | 0.3537 | -0.0090 | 0.0016 |
| 26 | rs35804313 | T | C | 0.2153 | -0.0114 | 0.0019 |
| 27 | rs36000545 | G | A | 0.3929 | -0.0148 | 0.0016 |
| 28 | rs3738449  | A | G | 0.3313 | -0.0117 | 0.0016 |
| 29 | rs3783256  | C | T | 0.6480 | -0.0097 | 0.0016 |
| 30 | rs4076108  | T | A | 0.2457 | 0.0102  | 0.0018 |
| 31 | rs4341996  | C | A | 0.2108 | -0.0109 | 0.0019 |
| 32 | rs490683   | C | G | 0.2908 | 0.0186  | 0.0017 |
| 33 | rs545608   | C | G | 0.2081 | 0.0264  | 0.0019 |
| 34 | rs57636386 | C | T | 0.0834 | -0.0247 | 0.0028 |
| 35 | rs60077625 | A | G | 0.3160 | 0.0143  | 0.0017 |
| 36 | rs6032233  | C | T | 0.8083 | 0.0127  | 0.0020 |
| 37 | rs60804050 | A | G | 0.2536 | -0.0106 | 0.0018 |

|    |            |   |   |        |         |        |
|----|------------|---|---|--------|---------|--------|
| 38 | rs6470764  | T | C | 0.2024 | -0.0170 | 0.0019 |
| 39 | rs66922415 | G | A | 0.2344 | 0.0440  | 0.0018 |
| 40 | rs7077783  | T | C | 0.1439 | -0.0150 | 0.0022 |
| 41 | rs7298201  | T | C | 0.4976 | 0.0102  | 0.0016 |
| 42 | rs73052033 | C | T | 0.1842 | -0.0161 | 0.0020 |
| 43 | rs74494415 | T | C | 0.0402 | -0.0302 | 0.0039 |
| 44 | rs74565893 | T | C | 0.0112 | -0.0408 | 0.0073 |
| 45 | rs7628343  | C | T | 0.9059 | 0.0155  | 0.0026 |
| 46 | rs7977788  | A | G | 0.2248 | 0.0262  | 0.0018 |
| 47 | rs836519   | T | C | 0.1960 | 0.0121  | 0.0019 |
| 48 | rs849136   | G | A | 0.7132 | -0.0131 | 0.0017 |
| 49 | rs931874   | T | C | 0.3784 | 0.0094  | 0.0016 |
| 50 | rs9327336  | C | T | 0.3451 | 0.0099  | 0.0016 |
| 51 | rs9341808  | A | C | 0.4802 | -0.0131 | 0.0015 |
| 52 | rs9379084  | A | G | 0.1172 | -0.0150 | 0.0025 |
| 53 | rs9381350  | A | T | 0.3486 | 0.0096  | 0.0016 |
| 54 | rs9826759  | T | C | 0.3533 | 0.0146  | 0.0016 |
| 55 | rs9861443  | C | A | 0.7137 | 0.0119  | 0.0017 |
| 56 | rs9915532  | G | A | 0.8290 | -0.0163 | 0.0020 |

|    |           |   |   |        |         |        |
|----|-----------|---|---|--------|---------|--------|
| 57 | rs9925273 | G | A | 0.1838 | -0.0129 | 0.0020 |
| 58 | rs9951619 | G | T | 0.7694 | 0.0131  | 0.0018 |
| 59 | rs9960148 | T | G | 0.3933 | -0.0090 | 0.0016 |
| 60 | rs9960619 | T | C | 0.3446 | 0.0090  | 0.0016 |
| 61 | rs9985795 | C | T | 0.4811 | -0.0091 | 0.0015 |

**Supplementary Table S3.** Statistical power on all MR analysis (two-sided  $\alpha=0.05$ ). R<sup>2</sup>: Proportion of variance explained for the association between the SNP or allele score and the exposure variable. IVW, inverse variance weighted method; OR, odds ratio; AF, atrial fibrillation; CKD, chronic kidney disease.

| Outcomes        | R <sup>2</sup> | Proportion of cases | OR(IVW) | Power | Sample size required for 80% power |
|-----------------|----------------|---------------------|---------|-------|------------------------------------|
| AF              | 0.0048         | 0.159               | 2.233   | 1.00  | 9,872                              |
| CKD             | 0.0237         | 0.106               | 1.432   | 1.00  | 20,150                             |
| Type 2 diabetes | 0.0122         | 0.095               | 1.339   | 1.00  | 68,733                             |
| Heart failure   | 0.0175         | 0.063               | 1.555   | 1.00  | 25,973                             |
| Hypertension    | 0.0164         | 0.256               | 1.119   | 0.86  | 187,940                            |
